# Supplementary material for: Transcriptional repression of BODENLOS by HD-ZIP transcription factor HB5 in Arabidopsis thaliana
Source: PubMed Central journal article supplement — J Exp Bot. 2013 May 16;64(10):3009–19. doi: 10.1093/jxb/ert137 (PMC3697942; doi:10.1093/jxb/ert137), 2013-05-16
Supplement: supp_ert137_jexbot095679_file001.pdf [file supp_ert137_jexbot095679_file001.pdf]

**Transcriptional repression of *BODENLOS* by HD-ZIP transcription factor HB5 in *Arabidopsis thaliana***

Ive De Smet<sup>a,b,1,2</sup>, Steffen Lau<sup>a,1</sup>, Jasmin S. Ehrismann<sup>b,1</sup>, Ioannis Axiotis<sup>a</sup>, Martina Kolb<sup>a</sup>, Marika Kientz<sup>b</sup>, Dolf Weijers<sup>b,3</sup>, Gerd Jürgens<sup>a,b,\*</sup>

<sup>a</sup>Department of Cell Biology, Max Planck Institute for Developmental Biology, D-72076 Tübingen, Germany.

<sup>b</sup>Center for Plant Molecular Biology, University of Tübingen, D-72076 Tübingen, Germany.

<sup>1</sup>I.D.S., S.L. and J.S.E. contributed equally to this work.

<sup>2</sup>Present address: Plant and Crop Sciences Division, School of Biosciences, University of Nottingham, Loughborough LE12 5RD, United Kingdom.

<sup>3</sup>Present address: Laboratory of Biochemistry, Wageningen University, Dreijenlaan 3, 6703 HA Wageningen, The Netherlands.

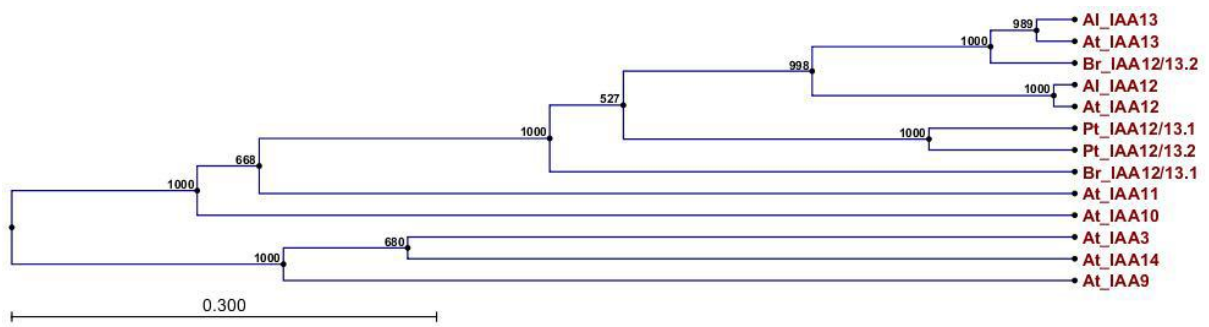

**Figure S1.** Phylogenetic relationship of IAA12 and IAA13 homologs and AtIAA3, AtIAA9, AtIAA10, AtIAA11 and AtIAA14. Al, *Arabidopsis lyrata*, At, *Arabidopsis thaliana*, Br, *Brassica rapa*, Pt, *Populus trichocarpa*.

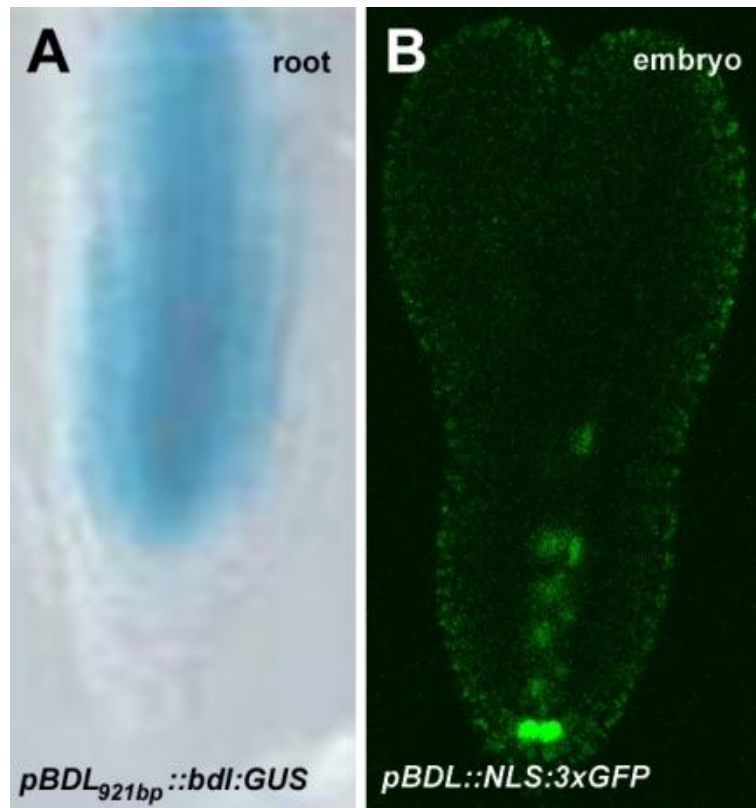

**Figure S2.** (A) *pBDL<sub>1000bp</sub>::bdl:GUS* expression in the root meristem (B) *pBDL::NLS:3xGFP* expression in torpedo-stage embryo.

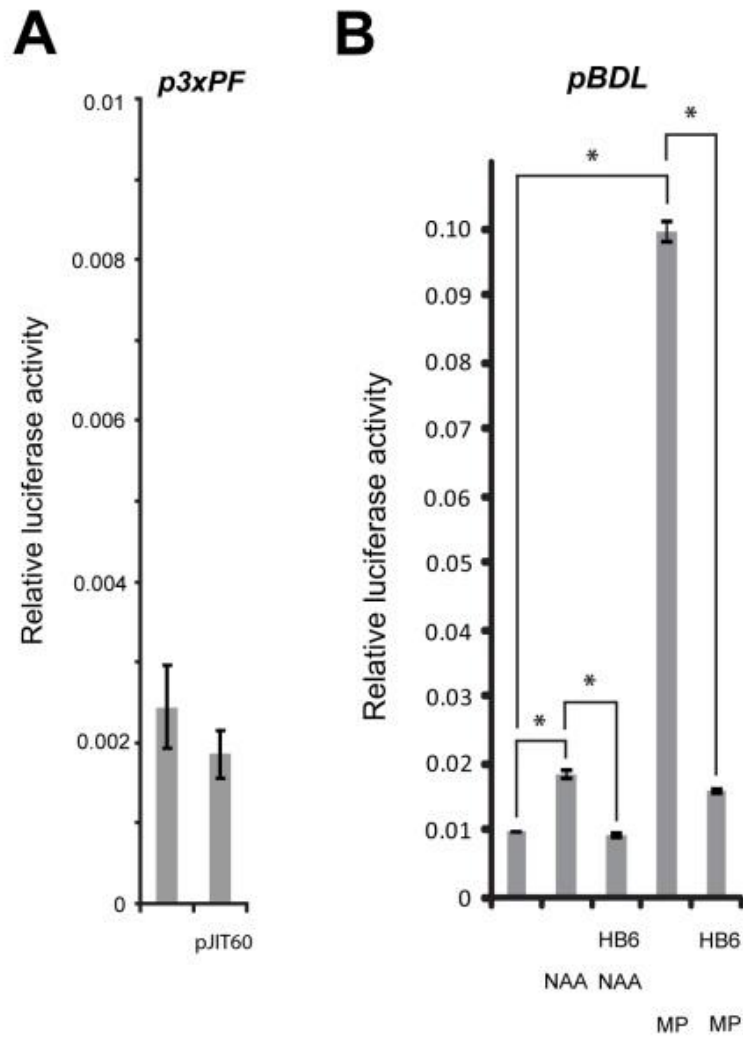

**Figure S3.** (A) Empty vector (*pJIT60*) does not significantly repress *p3xPF::LUC* expression. (B) HB6 represses auxin- or MP-induced expression of *pBDL::LUC*. Transient activity assay using *pBDL::LUC* as reporter construct in the presence or absence of HB6, MP and NAA as indicated. Values represent mean  $\pm$  s.e.m. \*, statistically significant differences for values as indicated by black lines, as determined by Student's *t* test ( $p < 0.05$ ); for statistical details see Table S1.

**Table S1.** Statistical details, i.e. number of biological replicates (n), the statistical test that was used, and p- values.

| <b>Transient Activity Assays (Student's t-test, two-tailed distribution, two-sample unequal variance)</b> |          |                                               |
|-----------------------------------------------------------------------------------------------------------|----------|-----------------------------------------------|
|                                                                                                           | <b>n</b> | <b>p-value</b>                                |
| p3xPF::LUC                                                                                                | 17       |                                               |
| p3xPF::LUC + HB5                                                                                          | 4        | 0.023982777417344 (vs. p3xPF::LUC)            |
| p3xPF::LUC + NAA                                                                                          | 13       | 0.00511018361506801 (vs. p3xPF::LUC)          |
| p3xPF::LUC + HB5 + NAA                                                                                    | 12       | 0.0172479925742428 (vs. p3xPF::LUC + NAA)     |
| p4xPF36::LUC                                                                                              | 14       |                                               |
| p4xPF36::LUC + HB5                                                                                        | 3        |                                               |
| p4xPF36::LUC + NAA                                                                                        | 12       | 0.000071208885780171 (vs. p4xPF36::LUC)       |
| p4xPF36::LUC + HB5 + NAA                                                                                  | 9        | 0.000111681769431711 (vs. p4xPF36::LUC + NAA) |
| pBDL::LUC                                                                                                 | 6        |                                               |
| pBDL::LUC + NAA                                                                                           | 3        | 0.00562278511084931 (vs. pBDL::LUC)           |
| pBDL::LUC + HB5 + NAA                                                                                     | 3        | 0.00980249790102142 (vs. pBDL::LUC + NAA)     |
| pBDL::LUC + MP                                                                                            | 3        | 0.000211341066818974 (vs. pBDL::LUC)          |
| pBDL::LUC + HB5 + MP                                                                                      | 3        | 0.000255057508922423 (vs. pBDL::LUC + MP)     |
| pBDL::LUC                                                                                                 | 3        |                                               |
| pBDL::LUC + NAA                                                                                           | 3        | 0.00399308644606912 (vs. pBDL::LUC)           |
| pBDL::LUC + HB6 + NAA                                                                                     | 3        | 0.000379475036834726 (vs. pBDL::LUC + NAA)    |
| pBDL::LUC + MP                                                                                            | 3        | 0.000298979203607784 (vs. pBDL::LUC)          |
| pBDL::LUC + HB6 + MP                                                                                      | 3        | 0.0000970250859890226 (vs. pBDL::LUC + MP)    |

**List S1.** Sequences used for the phylogenetic and the VISTA analysis.

**Protein sequences used for the phylogenetic analysis**

At\_IAA3

MDEFVNLIKETELRLGLPGTDNVCEAKERVSCCNNNKRVLSTDTEKEIESSSRKTET  
SPPRKAQIVGWPPVRSYRKNNIQSKKNESEHEGQGIYVKVSMDGAPYLRKIDLSCYK  
GYSELLKALEVMFKFSVGEYFERDGYKGSDFVPTYEDKDGDWMLIGDVPWEMFICT  
CKRLRIMKGSEAKGLGCGV\*

At\_IAA9

MSPEEELQSNVSVASSSPTSNICISRNLTGGLKEHNYLGLSDCSSVGSSTLSPLAEDDK  
ATISLKATELTLGLPGSQSPARDTELNLLSPAKLDEKPFPLPSKDEICSSSQKNNAS  
GNKRGFSDTMDQFAEAKSSVYTEKNWMFPEAAATQSVTKKDVPQNIPKQSSSTNN  
SSSPPAAKAQIVGWPPVRSYRKNTLATTCKNSDEVDGRPGSGALFVKVSMDGAPYL  
RKVDLRSYTNYGELSSALEKMFTTFTLGQCGSNGAAGKDMLSETKLDLLNGKDY  
VLTIEDKDGDWMLVGDVPWEMFIDVCKKLKIMKGCDAIGLAAAPRAMEKSKMRA  
\*

At\_IAA10

MNGLQEVCSSSGSMIGLPAEEDENAAHSSSEDSSCPDES VSETELDLALGLSIGRRKV  
RSSLSSSSSSLTRESGTRKSADSSPAAASNATRQVAVGWPPLR TYRINSLVNQAKSLA  
TEGGLSSGIQKETT KSVVVAANKDDACFIKSSRTSMLVKVTMDGVIIGRKVDL NALD  
SYAALEKTL DLMFFQIPSPVTRSNTQGYKTIKETCTSKLLDGSSEYIITYQDKDG DW  
LVGDVPWQMFLG SVTRLRIMKTSIGAGVGK\*

At\_IAA11

MEGGSASGSASALSNDENLVVSCEDSSSPIGNELELGLTSLGRKGYRDCRVYADDS  
SSSSSSSSLSRASVIAGIKRTADSMAATSGQVVGWPPIRTYRMNSMVNQA KASATED  
PNLEISQAVNKNRSDSTKMRNSMFVKVTMDGIPIGRKIDLNAHKCYESLSNTLEEMF  
LKPKLGSRTLET DGHMETPVKILPDGSSGLVLTIEDKEGDWMLVGDVPWGMFIGSV  
RRLRIMKTSEATGKDDIMKQIIYE EPFMF EAVIRQITDQREDKNIVRSFFFFSPLYSFFF  
GSAIFLLVSYMFSL\*

At\_IAA12

MRGVSELEVKGKSNLPAESELELGLGLSLGGGAWKERGRILTAKDFPSVGSKRSAESS  
SHQGASPPRSSQVVGWPPIGLHRMNSLVNNQAMKAARAEEDGGEKKVVKNDELKD  
VSMKVNPKVQQLGFVKVNMDGVGIGRKVDMRAHSSYENLAQTLEEMFFGMTGTT  
CREKVKPLRLLDGSSEFVLTIEDKEGDWMLVGDVPWRMFINSVKRLRIMGTSEASG  
LAPRRQEQKDRQRNNPV\*

At\_IAA13

MITELEMKGGESELELGLGLSLGGGTAAKIGKSGGGGAWGERGRLLTAKDFPSVGS  
KRAADSASHAGSSPPRSSSQVVGWPPIGSHRMNSLVNNQATKSAREEEEEAGKKKVK  
DDEPKDVTKKVNGKVQVGFIVNMDGVAIGRKVDLNAHSSYENLAQTLEDMFFRT  
NPGTVGLTSQFTKPLRLLDGSSEFVLTIEDKEGDWMLVGDVPWRMFINSVKRLRVM  
KTSEANGLAARNQEPNERQRKQPV\*

At\_IAA14

MNLKETELCLGLPGGTETVESPAKSGVGNKRGFSETVDLKLNLQSNKQGHVDLNTN  
GAPKEKTFLKDPSKPPAKAQVVGWPPVRNYRKNVMANQKSGEAEEMSSGGGTVA  
FVKVSMDGAPYLRKVDLKMYSYKDLSDALAKMFSSFTMGSYGAQGMIDFMNESK  
VMDLLNSSEYVPSYEDKDGDWMLVGDVPWPMFVESCKRLRIMKGSEAIGLAPRAM  
EKFKNRS\*

Al\_IAA12

MRGVSELEVKGKSNLPAESELELGLGLSLGGGAWKERGRILTAKDFPSVGSKRSAESS  
SHQGASPPRSSQVVGWPPIGSHRMNSLVNNQAMKAARAEEDGGEKKVAKNDELKD  
VSMKVNPKVQQLGFVKVNMDGVGIGRKVDMRAHSSYENLAQTLEEMFFGMTGTT  
SREKVKPLRLLDGSSEFVLTIEDKEGDWMLVGDVPWRMFINSVKRLRIMGSSEASG  
LAPRHQEQKDRQRNNPV\*

Al\_IAA13

MKGGESELELGLGLSLGGGTAAKIGKSGGGGAWGERGRLLTAKDFPSVGSKRAADS  
ASHAGASPPRSSSQVVGWPPIGSHRMNSLVNNQATKSAREEEEEAGKKIVKDDEPKD  
VTKKVNGKVPVGFIVNMDGVAIGRKVDLSAHSSYENLSQTLEDMFFRTNPGTIGLT  
SQFTKPLRLLDGSSEFVLTIEDKEGDWMLVGDVPWRMFITSVKRLRVMKTSEANGL  
AARNQEPNERQRKQPV\*

Br\_IAA12/13.1

MRGGSELELRKSNLPAESDLELGLGLSLGGGAWRERGRILTAKDFPSVGSKRAAADS  
SSSHHGASPPRSSQVVGWPPVGSHRMNSLANQAMKAEQGEGKEEGKKEDEPKDV  
SVKVVESGSGFVKVNKDGVGIGRKYVDVRAHSSYENLALTLEEMFFGRTGTTSVEKLLK  
PLRLLDGSSEFVLTYEDKEGDWMLVGDVPWRMFITSVKRLRIMGTSEASGLAQLRYI  
KEAEEIRLAMQPLDLIKTVREIEQEGTGGQETEQQKQNTAVDLSKRLKDFASSLKAL  
EEWRKRKMERARQRDLEKTGGLSLSKTS\*

Br\_IAA12/13.2

MGKAESELELGLGLSLGGGTAAKIGKQGGGGAWGERGRLLTAKDFPSVGSKRAAD  
SASHAGASPPRSSQVVGWPPIGSHRMNSLAAKSAREEEGEAGKKKVKDDKDVN  
KKVQVGFIVNMDGVAIGRKYVDLNAHSSYENLAQTLEDMFFRGNPGTIGLTGQFTK  
PLRLLDGSSEFVLTYEDKEGDWMLVGDVPWRMFITSVKRLRVMKTSEANGLAARH  
QESNERQRK\*

Pt\_IAA12/13.1

MEGCLGLLGGGGSSGASTNKSTLSKVEVIEAEASSYPVEAELELGLGLSLGSGGGGK  
GKANAWGECGRILTAKDFPSVRAADSVSHEGGSPTAGSQVVGWPPIRAYRMNSLVS  
QAKAARAEEEKGIGEKDKSKENLKKKICNGNKTNATGNEKGHLGFVKVNMDGVPI  
GRKYVDLNAHACYETLAQALEEMFFRSTTTINSIGGQKPLSKFSKLLDGSSEFVLTYED  
KEGDWMLVGDVPWGMFLTSVKRLRIMRTSEANGLAPRLQDRNEKQRSKPV\*

Pt\_IAA12/13.2

MSKVEVVEAEASSYPVEAELELGLSLGSGGRGGGGGKGGKANARGERGRILTAKDF  
PSVRAADSVSHEGGSPTAGSQVVGWPPIRAYRMNSLVNQAKAARAEEDKGIGEKDI  
SKDNLKKKICNGNKTSAPSNEKGHLGFVKVNMDGIPIGRKYVDLNAHACYETLAQAL  
EEMFFRSATTINSIGGEKRQVTKPSKLLDGLSEFLTYEDKEGDWMLVGDVPWGMF  
LNSVKRLRIMRTSEANGLAPRFQDRNEKQRIKPV\*

**1 kb 5' upstream regions used for the VISTA analysis**

At\_IAA12



ACTCCTTGATAATGATTTTGATCAAAAAGTGTAATTTCCACAAACCAATTGCGCCT  
GCAAAAGTTTTCAAAGGATCATCAAACATAATGATGAATATCTCATCACCACGAT  
TTTATAATAATGCATCTTTTCCCACCATTTTTTTTTCCCTCACTTTCTTTTATAATCT  
TGTTTCGACAACAATCATGGTCTAAGGAAAAAGTTGAAAATATATATTATCTTAGT  
TATTAGAAAAGAAAAGATAATCAAATGGTCAATATGCAAATGGCATATGACCATA  
AACGAGTTTGCTAGTATAAAGAATGATGGCCAACCTGTAAAGAGAGACTAAAA  
TTAGGTCTAAAATCTAGGAGCAATGTAACCAATACATAGTATATGAAATATAAA  
AGTTAATTTAGATTTTTTTGATTAGCCCAAATTAAGAAAAAATGGTATTTAAAACA  
GAGACTCTTCATCCTAAAGGCTAAAGCAATACAATTTTTGGTTAAGAAAAGAAA  
AAAACCACAAGCGGAAAAGAAAACAAAAAAGA ACTATATTATGATGCAACAGC  
AACACAAAGCAAACCTTGCACACACACATACTGTAAACAAGTTTCTTGGG  
ACTCTCTATTTTCTCTTGCTGCTTGAACCAAACACAACAACGATATCCCAACGAG  
AGCACAACAGGTTTGATTATGTCGGAAGACAAGTTTTGAGAGAAAACAACAAT  
ATTTTATAACAAAGGAGAAGACTTTTGGTTAGAAAAAATTGGTATGGCCATTACA  
AGACATATGGGTCCCAATTCTCATCACTCTCTCCACCACCAAATCCTCCTCTCTC  
TCTCTCTCTTTTACTCTGTTTTTCATCATCTCTTTCTCTCGTCTCTCTCAAACCCTAA  
ATACACTCTTTCTCTTCTTGTGTCTCCATTCTCTCTGTGTCATCAAGCTTCTTTTT  
TGTGTGGGTTATTTGAAAGACACTTTCTCTGCTGGTATCATTGGAGTCTAGGGTTT  
TGTTATTGAC

At\_IAA13

TTCCACACATCAATTGCGATTGAAAAAGTTTTCAAAGGATCATCATAGCTCACAT  
CAAGAAACATGATGATGAATAATCTCATCACCCTATTTATTTAATAATTCCTTA  
TAATGAAAACCAATTTTGTCTCACTTTATTTGGAACCCATCATAGTCTAGTCCTC  
CACGAAAAAAGAAAAGAAAATAAATGAGCATATAGTGACCCAAAACCTAAACC  
CAAATTCAACTTTTTTTCAAACCTGGTACTTAGCTATACGTTTTCACATATTTAAC  
AGTTGTTACTATGAACATGATATAAAGCATAGCTAACCAGATAAGATCAAACGC  
AACGAATACAAAATAAACTCTAATATAGCAATCATCAAACGAATACAAATTCT  
TGCAAAAATAGAAAAGAAAGTGTGATGCAAAAACAAAGCTTTCCACAAATACAA  
ACACATAACACAAAAACAACAGTTTATATATTTAATATAGTTTAATAAGATATGT  
TTGTTTTGTTTATCATATTTTTTTTATAAACACAGGAGAAAACAATAAGGTAAACG  
GGAGCACGACAAGTTTGATAATGTCGGGAAGAAAAGTTAAAAAGAATTTCTTTG  
TTAATAATAAAATTAGGGAATAAAAAAAGGGTAAAAGAGAAGAAGAAGAATG

GCATTGTTGTTGGTATGGCCACTACCAGACATATGGGTCCTACTCTTCTCATCACT  
CTCTCCACCACCTAATCCTCTCTCTCTTTCTTCTTCTCAATTCTTGAAACTCTCTT  
TCAGATTTCAAGAAACCCTTAAAATCCTCTCTCTGTCTCTTTCTGTTTGTGTTT  
CTTGTTCCTTCTCTCTCTCTTTCTTTCTTTGTCTTCCCTTTCCCAGGTTGTTTTT  
TTTGTCTCTCTGCCTTCTTGACTTTCAAAGACTCTTTCTTTCTTTTGGATTGATT  
TTGGATTCTAGGGCTCTCTTTCTTTTAGTGGGTTTTTGTGTTGTTGTTGTGGTCTC  
TCTG

AI\_IAA12

GCAATTTAAACGTAGGAATGGACGAATGGTTGTTATAATAAACTTATAATATGAC  
TCAATCCACTATTCAAATTTAGTTTTTGATTTAACTTTAATATAGTATCAAACC  
TAATTTAATTTGAGTGCAAGTTGAAATTCGATTCAGCATAAAAAGAACAAAATA  
AACGTATAATTTGGAAAAAGGTGTTAAGGAAATTCATATCGAATACTAGAAC  
ATATGATCTAACATAATAAGTTAAGCTAATGTACTCTTTGTAGCTAACGTGACAG  
AAACAATTATCTATTTTGAAGAAAAGTGTGTGTTTACATATACAATTTTGTGTAA  
GCTTTTTAGACCTCTAGACGTATTATAGAAACAAGCTGCAACATTAATGCCCCC  
TAACTAAATAGTATAATCCATAAGTTTATCTAGATTCTTTGATTAGTCCAAAGCA  
AAGAAATACAGTATGATATTTAAAACAGCGACTTCATCCGAAAGCAACACAATA  
TAGCCATTTTACACCAAAAAGAAATACAAGTGGAAAAGAAAACAAAAACTATA  
TGATGTAACAAAAAGCAAAAACCTTGCACACACACACACACAACTGTAAACA  
AGTTTCTTGGGACTCTCTATTTTTCTCTTGCTGCTTGAACCAAATACAACAATATA  
ACGCAACGAGAGCACGACAGGTTTGATAATGTCGGGAAGAAAAGTTTGAGAG  
AAAGCAAACAATAATTTAATAACAAAGGAGAAGACTTTTGGTTAGAAAAAATG  
GCATTATGGTTTGGCCATTACAAGACATATGGGTCCCAATTCTCATCACTCTCTCC  
ACCACCAAATCCTCCTCGCTCTCTTTACTCTGTTTTATTTCATCATCTCTCTCTCG  
TCTCTCTGAAACCCTAAATACCCTCGTTCTCTTTTGTCTCCATTCTCTCTGTC  
CATCAAGCTTCTTTCTTGTGGGTTCTCTCTTTAGTATCTTTGGAGTCTAGGGTTTT  
GTTATTGAC

AI\_IAA13

TGAATATTGAATTGAACTAATTTAAAGCGAATATAAAAATGTTATACTATAGTG  
GTGTTTTCTTAATTATTCAAATCCAAAATAAAAATTTATTAGATACATAATAATCT  
TTTAAGTTTCAAACCATAATAACATAGTTGATGACAAAATATTGTAAAGATTAAT  
ATAATTTTTTGAACAAAATGATTAGTCATTCCAATCAAATTTAACAGTTGTAT

ATCCACTATCTTCATATATTCCAATAGTGATCCAAAATTAACCTAAAATTTTATT  
TTTCAAACTGGTACGAAGCTATACATTTTCACATATTTAGCAGTTTTGTTGCCAT  
ATAAAGCATAGCTAGCAGATAAGATCAAACGAATACAAGTAACTCCATATAGC  
AGCAATCATCAAACGAATACAAATTCTTGCAAAAATAGAAAAGAAAGTGTGAT  
GTAAAACATAGCTTTCCACAAATACAAAACACAAACCACAAAACAACAATTTTT  
ATTGAATAAGATTAGTTTTATCATTTTTATAAACACAGGAGAAAACAATAACGCA  
AACGAGAGCACGACAAGTTTGATAATGTCTGGGAAGAATTTGGTTATAATTAGA  
ATTAGAAATAAAAAAGTAAAAGAGAAGAAGAATGGCATTGTTGTTGGTATGGCC  
ACTACCAGACATATGGGTCTACTCTTCTCATCACTCTCTCCACCACCTAATCCTC  
TCTCTCTTTCTCTTTCTTCTTCTCAATTCTTGAACTCTCTTTCAGATTTCAAGAA  
ACCCTTAAAATCCTCTCTCTGTCTCTTTCTGTTTGTGTTTCTTGTTCCTTCTCT  
CTCTCTCTCTCTCTTTCTTTGTCTTCTTCCCAGGTTTTTTTGTCTCTCTGCTT  
TCTTGACTTTCAAAGACTCTTTCTTTCTTTTGGGTTGATTTTGGATTCTAGGGCTC  
TCTGCTTTTAGTGGGTTTTTGTCTTGTGTTGTTGTTGTTGTTGTTGTGAATTCTCTG

Br\_IAA12/13.1

AGGTAAACAAATGTTTCAAATTTGTTGTGTTATTGTTTTGTCTATAAATTACAA  
AATTTATTGAATTAATATATTTAATTATTACACCCTTAAATAATATTTTATTAAGA  
CATTAGAGAAGTATATTTTAATTGTTTCCTATGCTTTTTTCATATTTTTTCACGAAAA  
TTATATGTTAACTTACTTTTACAAAATTCTTAACTTTGTCACGAAAACAAAAT  
CTATGATTTTTTCATATTTGTCAACGTTCTCACACTTTCTAAGAATATATTAGCTTA  
GTCACTTACTTATTTTTTTTTTACAAAACAAAGTATCGGAGTCTTGAAAGTTGAAT  
TTATATTATTGTAAATGTACATAAGAGTTTGTGATTATATACTTAGTGGTTCTTGT  
ATATGTGTCCAAGAATGTTTCAATGGCTTAGTGGTAACTGTCCTATATATATATC  
ATACTAACCCGGGTTTCGATTCTCACCTTCGCATTGTTTTTTTTATTTTTTACGAAA  
AGTAAATGAGGTGACATGGCAATTTTGGGTTCTCTGATTGGTTGATTTTTCTATCC  
TATGTGGACACCCTCTCCATGGTTTATATCCCCCTTTTAGTATAGTATAGATTTAT  
TATACACACAAGTAAACAAGGTTCTTGGGACTCTTCTCCTCTAGCCCTGCTTG  
AACCAACAGGTTTGATGATGTCTGGGGAAAATAATTTAAACAAAAGACAAGA  
CTAGTGTAAAAAACAAGACTTTGGTTAGAAAATTAGCATTGT  
GGTATGGTCTCATTACAAGACAGATGGGGTCCCCTTCTCTCTATACTCTGCTTT  
CATCATCTCTTGTCTCTCTCTCCCCCTCTCTCAAATAAGACTGAAGAAACCCTATA  
TACCCACACTCTCTCTGCTTTTGTCTCCATATCGAGTGTGTGTCCTCAAAGCCTCT  
TCTCTTGGACGGTTCTTTTGAAGTCTCTCCCTTTCGAATTCCTTACTGACA

Br\_IAA12/13.2

TCAATCATAGTCTCCAACAAAACATAAATAAATAAGCAAGGGGAATATACATAT  
GATATAATGACAACCTTTTTTTATTTTGTAAAAACAATACATGGGTATTAAAAT  
GAAACTCATTGATTAGTGAAGAAAACATATCATATCATTATCACTGATACAAAA  
ATATATAGATATGCATAAGCATATCAATCTTTAAGTTCAAAGATAATAGCATGAC  
TAAAGACTAAAATGATTAGTCATTCCAATTAGATTTTAAACAGATGTATCTCCACT  
ATCTGTATATAGATTGCATTATTGTCTTATTGATCATAATTAACCTTTTCAAACT  
GGTTAGCTATACATGTTTCATATATCTAGCCAGTTTTGCGTTTAATGAATATGATAA  
AGCATAACTACCAAATAAGATTTGTATGAATACAAATAAACGATCCATATATGGT  
GGTGATCATCAAACGAATACAAATTCTTGCAAAAATAGAAAAAGAAAGAGTGA  
TGTTTAAACAAAGCTTTCCACAAATTATACAAGAAACAAACAACTGTTTTTCATA  
CTATATAGTTTTTTAAAGTTTTTATTTTCATTTATAAACAAAACAATTAACGCAACG  
GGAGCACGACAAGTATGATAATGTCGGGAAGAAAAGTTAAAATCTTTACTAATA  
AAATAGAAATAAAAAAGTAGAAAAGGACTTTAAAGAGGAAAGAATGGCATTGT  
TGTTGGTATGGCCTATGGCCACTACCAGACATATGGGTCCCGTTTCTCATCACTCT  
CTCCACCACCTAATCCTCTCTCTTTCTTCTCCTTGAACACTCTCTCCAGATTTCAA  
GAAACCCTTAAAATCCTCTCTCTGTCTCTTTCTGTGTTGTTTGTTCCTGTTTCCT  
TCTCTCCTCTTTCTTTGTCTCCTTTGCACTCTCAGGTTGTTTTCTTTTCTTAAGTTCT  
TGACTTGTAAGTCTCTTTTGGGTTTTGTTGTTGTTGTCTAAATGATTTCTGAGCTT  
GAG

Pt\_IAA12/13.1

AAGGAAGGTGTATAGCCCAGTAGAGATTAGTATATGCTTTTGCTTGTA AAAAGAC  
TCGAGCTTTAGACTTTAACCTATGCTTTTACATTAAGCTAAGAGACACCTAAGC  
TCAAATTAAGTCTCGGTTTGTTCTTTAATCACGAGTCATTAATTATCATCATCG  
TCTACATCTGCAACTTTTTTCAAGAATTCTTATCCTATTTAGGCATCCATTACGAT  
ATTCCTAAGAAAATTACTACA ACTTAATTAGAATCATTATAGTTTGTTACCCATTT  
CTTAGTTTTAATCATA CATTATAAACTCCTTTTTTGCTGCACAAAACCCCAATTT  
AGCCAAAGGCCTCTCTCTATCTTTATCTGTACGTAGTGATTTGATACTTGTATAG  
TATGTGAGTTGAAACAAAATCTTATTTTTTAAGATTCTCGATAAAAAGAAATTC  
TAAAATAAATCGATTGGACTTGAAGGATTATATTTCAATATTATTGCTGGTAAAT  
TCACACAAGTAGCTAGATTTTGTATTTTATAACTCAATATATAGGCATCTATATCC  
TAGTCTCTTTAAAAGGTCTCCTCTCGAGAAATTAACAGTAAATTACAGTAGGTA

TTTTTTAAGAAAAAATGTTTATTCTTTATTGTTATGGGTGGGAATTCTTCATTTAA  
TTTTGTGTACCAACAGAGAAAATCAGATTCTAACAGACATGATGATCATGTCAA  
GAAAAATTGACAGTGTGTTGTGGACCTGTGTTGAGAGTGCTTGGCGCACTAGCAG  
ACATATGGCCCCACGGTCATCACTTCCTCCACCACCTTCCTTCCACCCCTAGCTAC  
ATCTTACCTCCCCTTTCCCTCCTAATTCCTGTACTTCTAGTGCTGGTGCCCGGTAT  
TTTTCTCCTTGTCTCCTATACTGTAACGCATTCTGGTTTCTTCTCTTTAAAAAAAGC  
ACACTTCTTTAACCTTTTCTTGAATCTTGAAAATTCAAAGACTGTATCTTGATG

Pt\_IAA12/13.2

TTTAGAAAAAAAACATATTACAATCCTAGTGAAGTCCATAACTTGATTCACAGGT  
TTAACGTGATAGCTTGAGTTACACGATTTACTGGTTTGACAAGTTTAACCATCGA  
TCAAATATGCTTTTTTTGGTCATTTGATTTCTTTTTCAATTCGTTTTTTAATATTA  
GATTGGTTGGCCAATATACTTATGATTTATTTTTGTTTGTCTCTACAAGGTTATT  
ACTGTCTAAAATGAGTGTGTATTTTTAGGTTGTTGCTTAATTTTTATAAGCATATA  
TTTTTATTATATAATTAAGTAAAATTTTTTTATAAAAAATGCCATGAAACCCAATA  
CAGTTCATGATTCAGGTCGTTGAGGAATTATTGTCAATCAAATCTGTTACTATCTC  
AATATATTTTTTTAAAAATTATTATTTTAAATTTTATAAACTTAAACAGTGTTTT  
TACCCGTTATTAAGGTTTTAAAATTGACTTGCTTAAACAAATTTAATAATGGTTA  
AAAAAATTTCTACAGTCTTAATATTTTTTTTTATATTTTTTAAAAATTAATCCAAA  
TGTGTTTATATATATTTTTGGGTGGGAATTTTCATTTAATTTTGCGTACCTACAGA  
GAAAACCAGATTCTAAAGAGACATGATGATCATGCCAAGAAAAATTGACTGTAT  
GTGTTGTGGACCTGTGTTGAGAGTGCCTGGCGCACTACCAGACATAAGGGTCCCA  
CAGTCATCACTCCCTCCACCACCTTCCTTCCTCCCCTAGCTAGCTACAACCTACCT  
TCCCTTCCTTTCCCTCCTCATTTCCTGGACCACTAGTAATCCTAGTATTTTTCTCCTC  
TCCTATACCGGAACGCATTCTCTCCCTCTCTGGTTTCTTAGTTCTAAAACATAAAA  
AACTTATTTAACCACGAGCACAAAGACTGTATCTTTATGATGGCAGGTGGTCTTG  
GTTCACTCGGCGGCGGCGGCTCTTCCGGGGCCTCCACAAATGACTCCACA
